# Supplementary material for: Dietary Curcumin Supplementation Increases Antioxidant Capacity, Upregulates Nrf2 and Hmox1 Levels in the Liver of Piglet Model with Intrauterine Growth Retardation
Source: PubMed Central journal article supplement (PMC6950043; doi:10.3390/nu11122978), 2019-12-05
Supplement: nutrients-11-02978-s001.pdf [file nutrients-11-02978-s001.pdf]

**Supplementary Tables**
**Table S1.** Composition of basal diets (as-fed basis)

| <b>Ingredients</b>            | <b>Ratio (%)</b> | <b>Nutrient composition</b> |       |
|-------------------------------|------------------|-----------------------------|-------|
| Corn                          | 57.70            | Digestible energy (MJ/kg)   | 14.04 |
| Soybean meal                  | 12.50            | Crude protein (%)           | 18.31 |
| Expanded corn                 | 8.00             | Lysine (%)                  | 1.31  |
| Full-fat soybean              | 8.00             | Methionine (%)              | 0.40  |
| Soybean meal, fermented       | 4.00             | Methionine + Cystine (%)    | 0.70  |
| Whey powder                   | 3.00             | Threonine (%)               | 0.80  |
| Fish meal (crude protein 67%) | 3.00             | Calcium (%)                 | 0.85  |
| Dicalcium phosphate           | 1.80             | Total phosphorus (%)        | 0.72  |
| Limestone                     | 0.50             |                             |       |
| L-lysine (78 %)               | 0.30             |                             |       |
| L-threonine                   | 0.10             |                             |       |
| DL-methionine                 | 0.08             |                             |       |
| Wheat middling and reddog     | 0.02             |                             |       |
| Premix <sup>a</sup>           | 1                |                             |       |
| Total                         | 100              |                             |       |

In the experiment 2, NBW and IUGR groups were fed with a basal diet, and the NC and IC groups were fed with a basal diet supplemented with 400 mg/kg curcumin.

<sup>a</sup>The premix supplied the following per kg complete diet: vitamin A, 12000 IU; vitamin D<sub>3</sub>, 3000 IU;  $\alpha$ -tocopherol, 50 mg; vitamin K<sub>3</sub>, 4 mg; vitamin B<sub>1</sub>, 4 mg; vitamin B<sub>2</sub>, 10 mg; vitamin B<sub>6</sub>, 7 mg; vitamin B<sub>12</sub>, 0.05 mg; niacin, 30 mg; pantothenic acid, 15 mg; folic acid, 0.3 mg; biotin, 0.08 mg; choline chloride, 500 mg; Fe (FeSO<sub>4</sub>·H<sub>2</sub>O), 110 mg; Cu (CuSO<sub>4</sub>·5H<sub>2</sub>O), 7 mg; Zn (ZnO), 110 mg; I (KIO<sub>3</sub>), 0.3 mg; Mn (MnSO<sub>4</sub>·H<sub>2</sub>O), 5 mg; Se (Na<sub>2</sub>SeO<sub>3</sub>), 0.3 mg.

**Table S2.** Primer sequences used for quantitative real-time PCR assays

| Gene          | Accession no.  | Primer, 5'-3'                                                         |
|---------------|----------------|-----------------------------------------------------------------------|
| <i>Nfe2l2</i> | NM_006164.4    | CTCCGGGTGTGTTTGTTC<br>CA                                              |
| <i>Hmox1</i>  | NM_001004027.1 | GTTGTTTGC GAAGGTCGCTG<br>CAACCCTGTGAATGCAACCG<br>CACATGCCCAACAAGGAAGC |
| <i>Cat</i>    | NM_214301.2    | TGTGAACTGTCCCTTCCGTG<br>CGTCTGTTCGGGAGCACTAA                          |
| <i>Gpx1</i>   | NM_214201.1    | TGGGGAGATCCTGAATTGCC<br>CGAAGAGCATGAAGTTGGGC                          |
| <i>Actb</i>   | XM_003124280.4 | CAGTCGGTTGGATGGAGCAT<br>AGGCAGGGACTTCCTGTAAC                          |

*Nfe2l2*, nuclear factor, erythroid 2-like 2; *Hmox1*, Haeme oxygenase-1; *Cat*, catalase; *Gpx1*, glutathione peroxidase 1; *Actb*,  $\beta$ -actin.

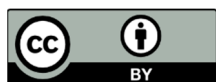

© 2019 by the authors. Licensee MDPI, Basel, Switzerland. This article is an open access article distributed under the terms and conditions of the Creative Commons Attribution (CC BY) license (<http://creativecommons.org/licenses/by/4.0/>).
